# Supplementary material
Source: MDPI journal article supplement (https://www.mdpi.com/2073-4441/12/9/2542)
Supplement: s1 [file s1]

**Table S1.** Average monthly air temperature and rainfall during a multi-year average (2009-2019) in the ExpA\_1.

| <b>Month</b> | <b>Minimum Air Temperature (°C)</b> | <b>Maximum Air Temperature (°C)</b> | <b>Rainfall (mm)</b> |
|--------------|-------------------------------------|-------------------------------------|----------------------|
| January      | 6.98                                | 14.72                               | 117.45               |
| February     | 6.71                                | 14.11                               | 89.92                |
| March        | 7.84                                | 16.48                               | 79.63                |
| April        | 10.15                               | 20.19                               | 41.45                |
| May          | 12.53                               | 23.56                               | 23.11                |
| June         | 16.23                               | 28.94                               | 6.36                 |
| July         | 18.95                               | 31.74                               | 2.45                 |
| August       | 19.78                               | 32.11                               | 6.23                 |
| September    | 17.73                               | 28.01                               | 54.63                |
| October      | 15.08                               | 24.26                               | 80.18                |
| November     | 15.03                               | 19.96                               | 84.27                |
| December     | 8.32                                | 16.72                               | 49.45                |

**Table S2.** Average monthly air temperature during a multi-year average (2009-2019)  
in the ExpA\_2.

| <b>Month</b> | <b>Minimum Air<br/>Temperature<br/>(°C)</b> | <b>Maximum Air<br/>Temperature<br/>(°C)</b> |
|--------------|---------------------------------------------|---------------------------------------------|
| January      | 8.29                                        | 15.71                                       |
| February     | 8.14                                        | 15.73                                       |
| March        | 9.64                                        | 17.85                                       |
| April        | 12.17                                       | 20.93                                       |
| May          | 14.96                                       | 25.59                                       |
| June         | 19.45                                       | 27.98                                       |
| July         | 22.19                                       | 30.97                                       |
| August       | 22.79                                       | 31.25                                       |
| September    | 20.39                                       | 28.32                                       |
| October      | 16.63                                       | 24.64                                       |
| November     | 12.93                                       | 20.84                                       |
| December     | 10.69                                       | 17.32                                       |
